# Supplementary material
Source: HighWire-hosted journal article supplement (https://cmaj.ca/highwire/filestream/78598/field_highwire_adjunct_files/4/202604-res-5-at.pdf)

## Appendix 5. Association between COVID-19 and pregnancy outcomes for studies with small sample size (n<100 in each group) using fix-effect models

### 5.1 COVID-19 vs no COVID-19

#### 5.1.1 Association between COVID-19 and preeclampsia

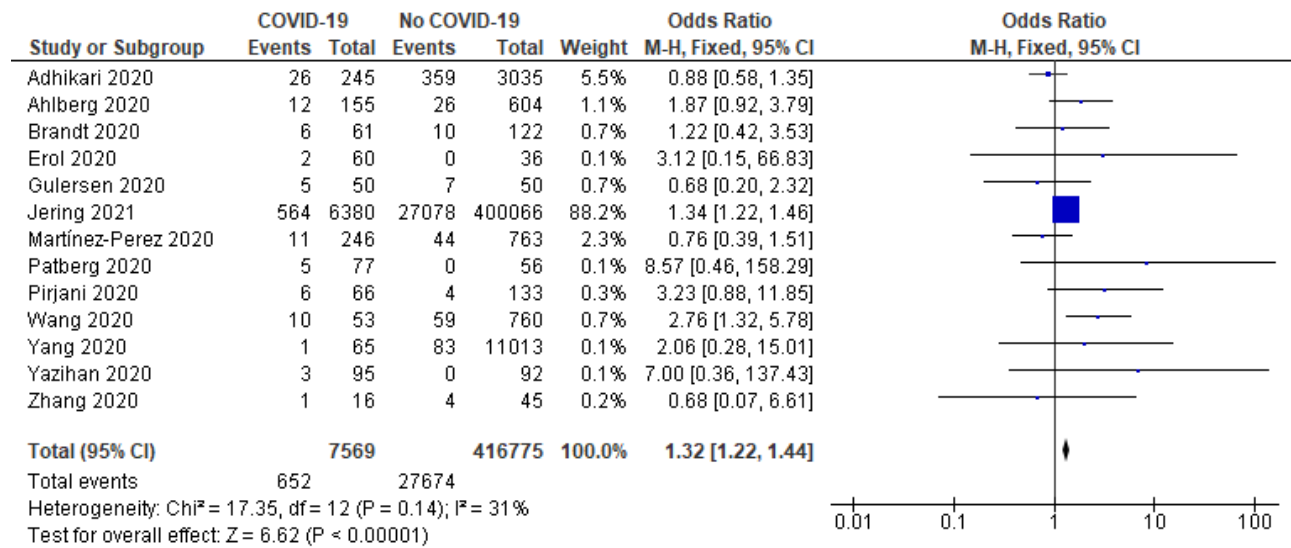

#### 5.1.2 Association between COVID-19 and preterm birth

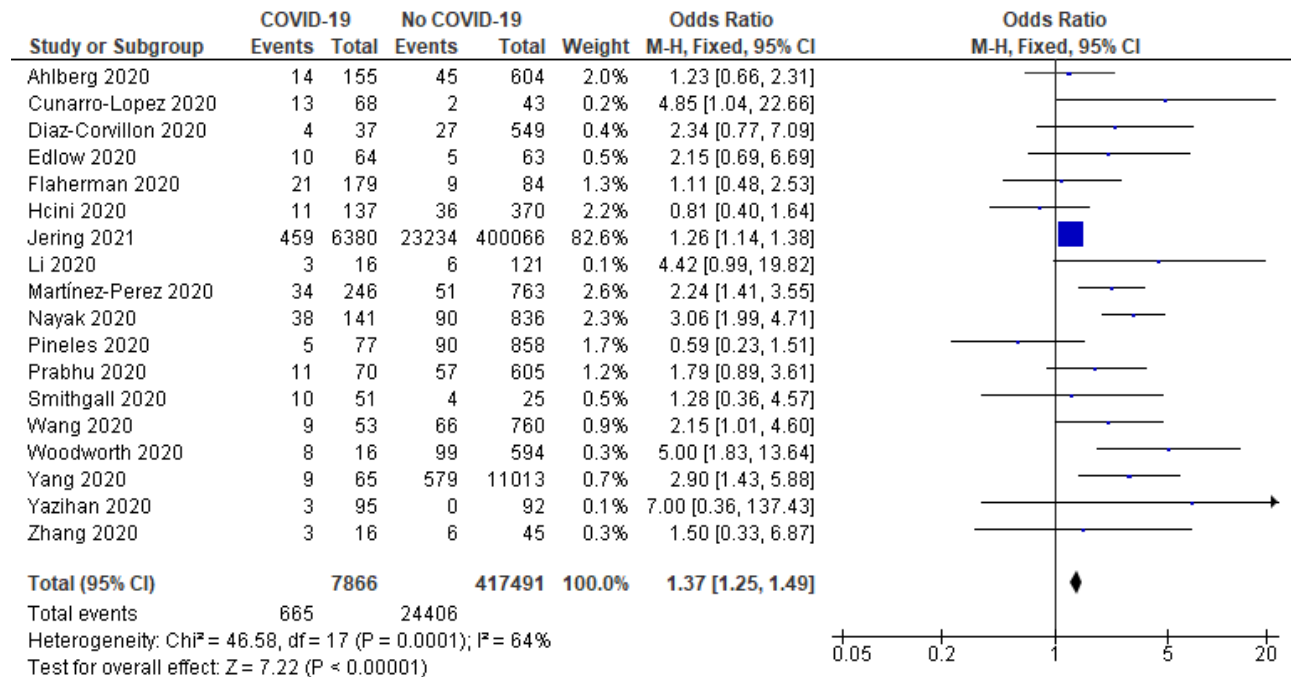

### 5.1.3 Association between COVID-19 and stillbirth

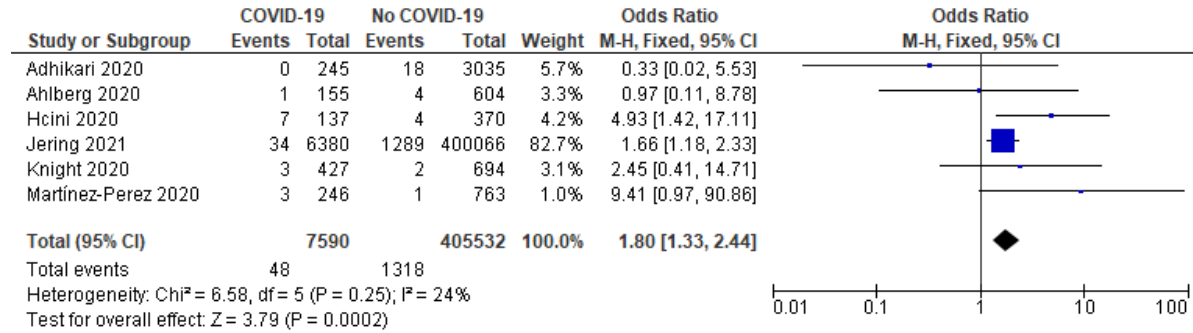

### 5.1.4 Association between COVID-19 and intensive care unit (ICU) admission

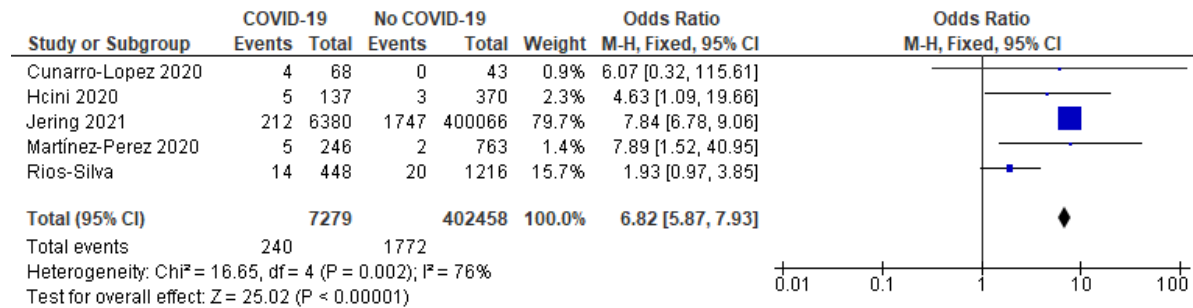

### 5.1.5 Association between COVID-19 and birth weight (grams)

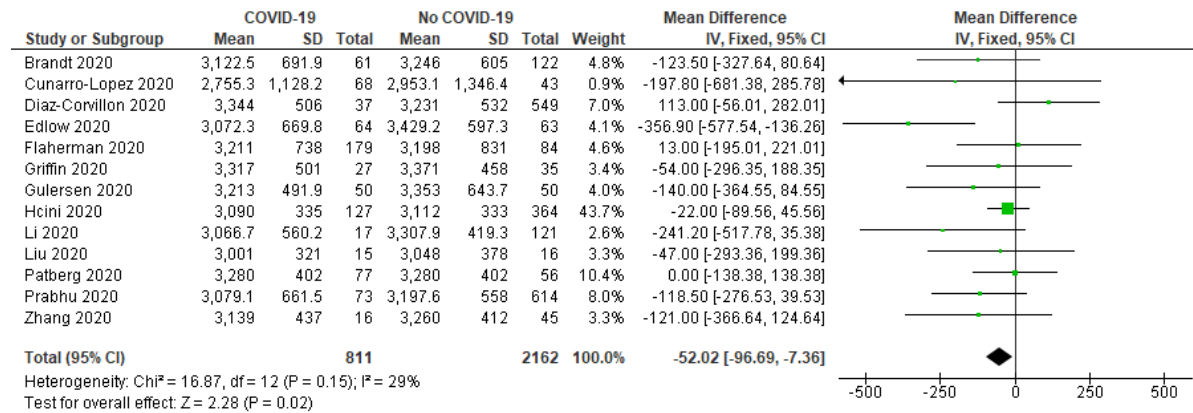

### 5.1.6 Association between COVID-19 and neonatal intensive care unit (NICU) admission

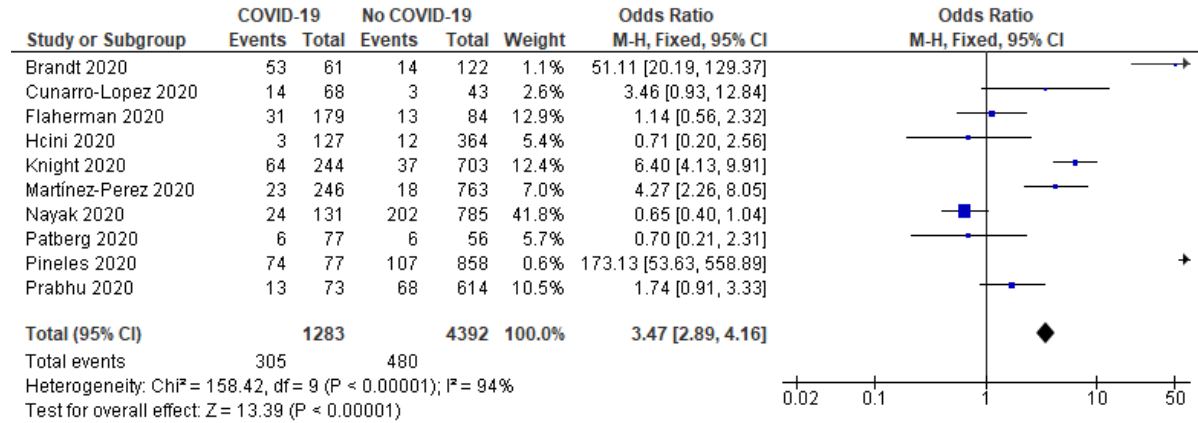

## 5.2 Symptomatic COVID-19 vs asymptomatic COVID-19

### 5.2.1 Association between symptomatic COVID-19 and cesarean delivery

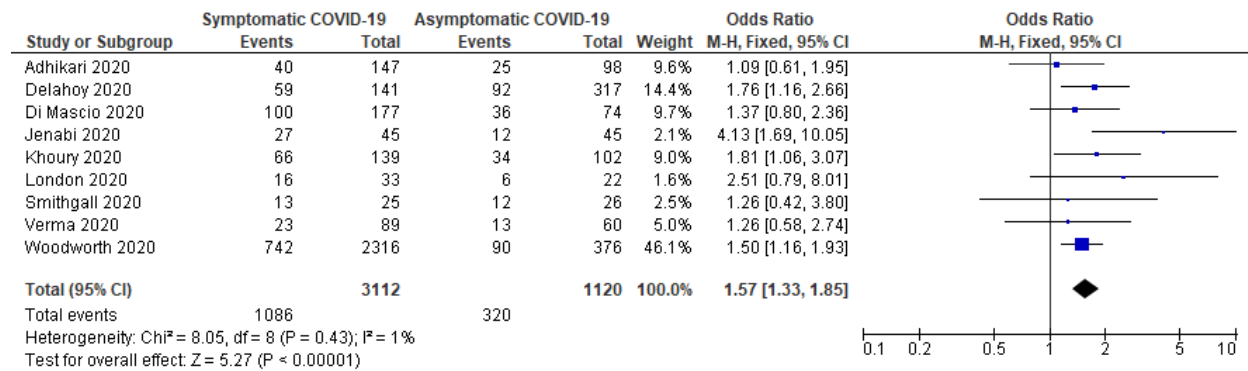

### 5.2.2 Association between symptomatic COVID-19 and preterm birth

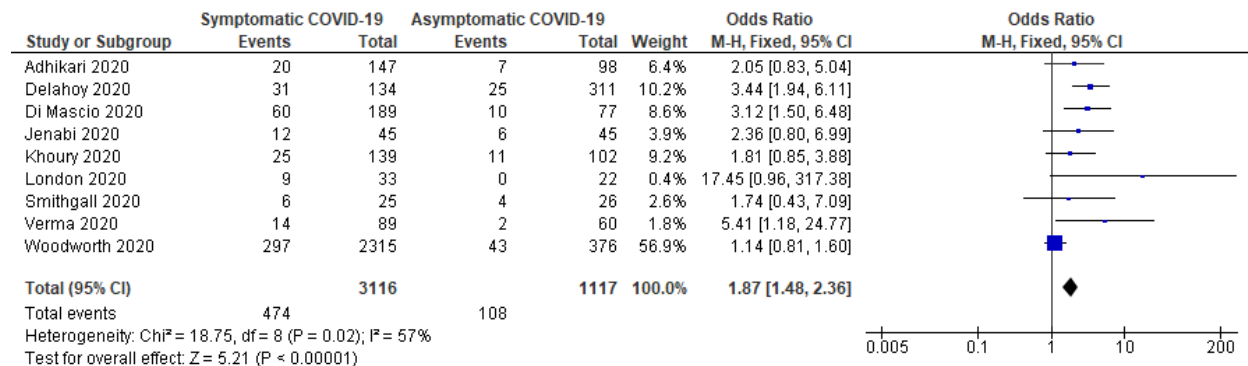

### 5.3 Severe COVID-19 vs mild COVID-19

#### 5.3.1. Association of severe COVID-19 with preeclampsia

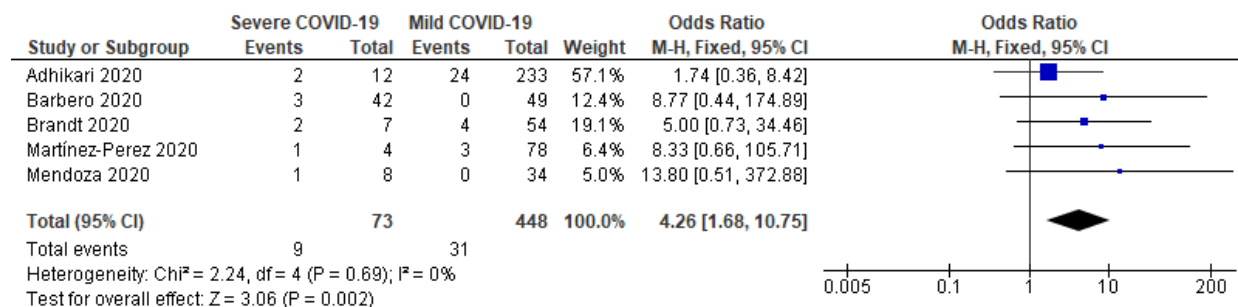

#### 5.3.2. Association of severe COVID-19 with gestational diabetes

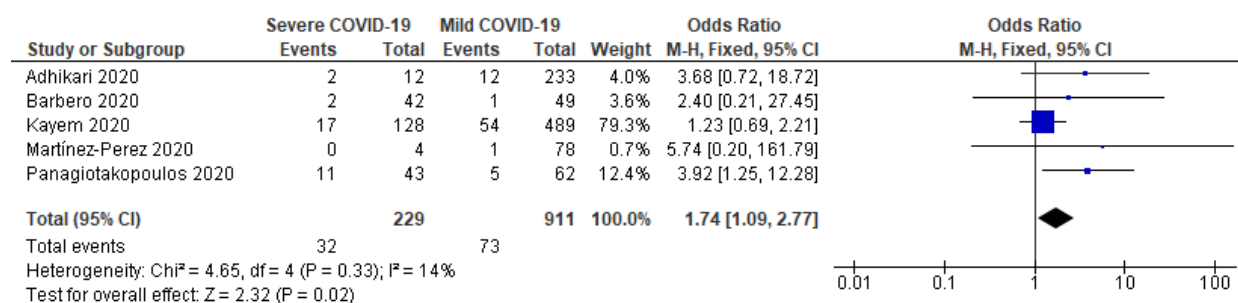

#### 5.3.3. Association of severe COVID-19 with abnormal liver function

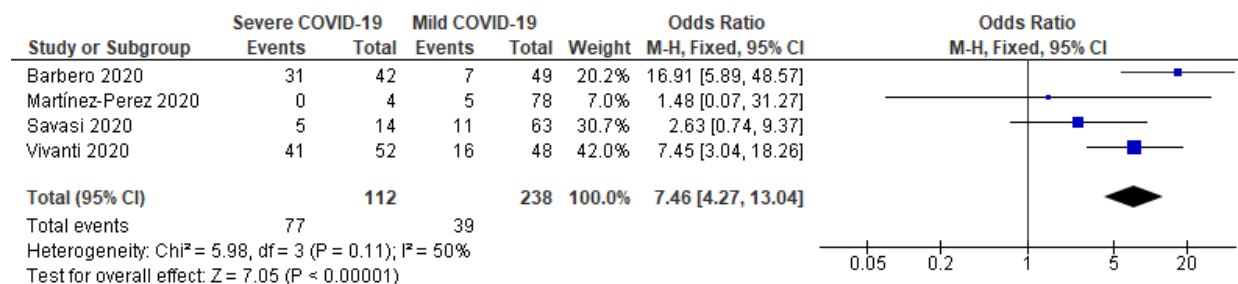

### 5.3.4. Association of severe COVID-19 with lymphopenia

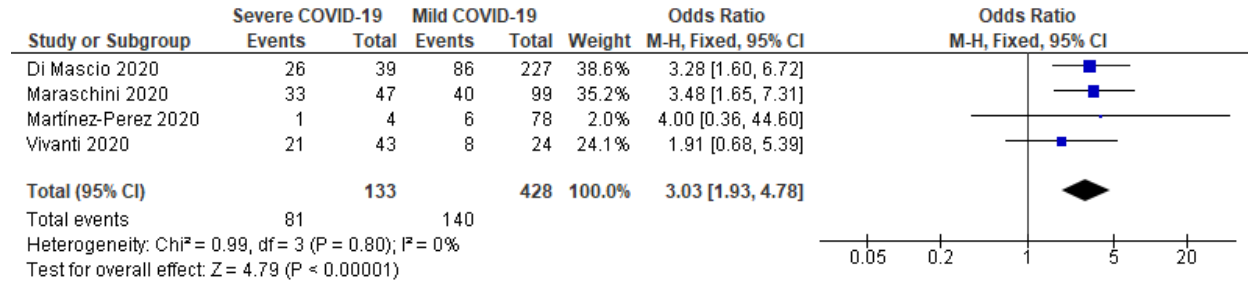

### 5.3.5. Association of severe COVID-19 with intensive care unit (ICU) admission

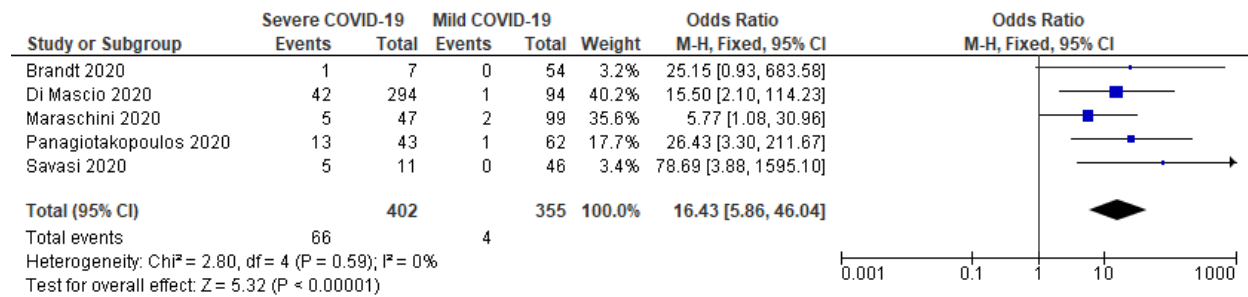

### 5.3.6. Association of severe COVID-19 with mechanical ventilation

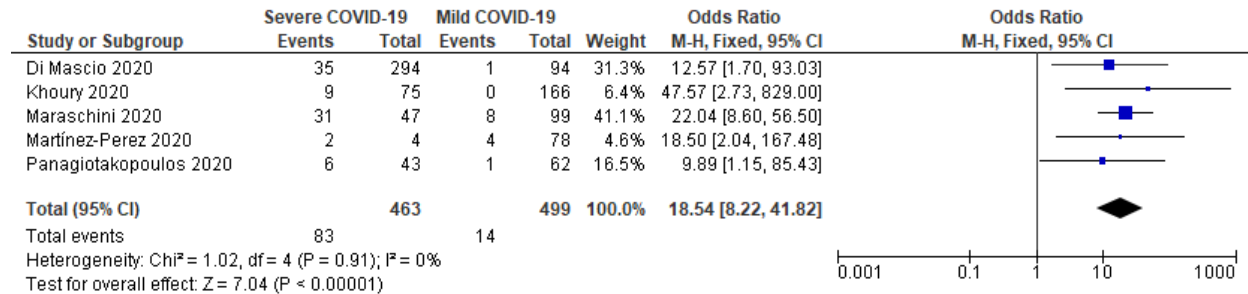

### 5.3.7. Association of severe COVID-19 with cesarean delivery

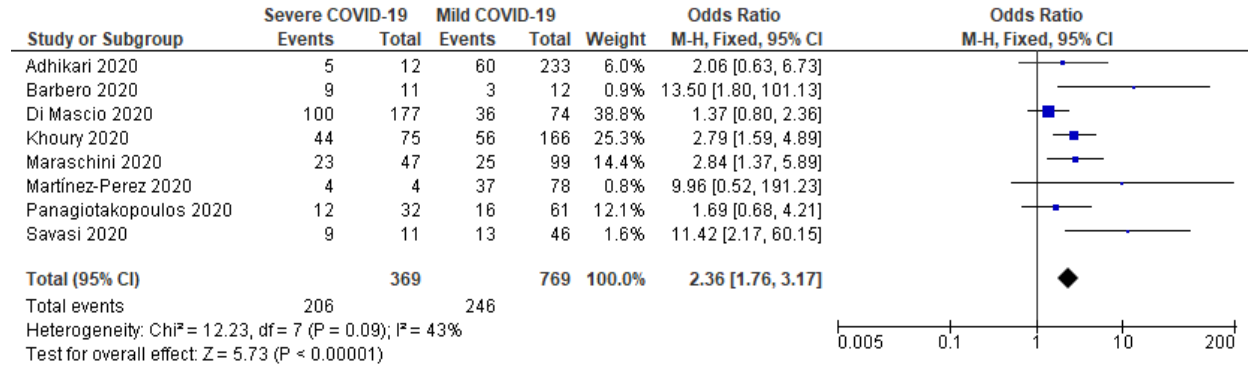

### 5.3.8. Association of severe COVID-19 with preterm birth

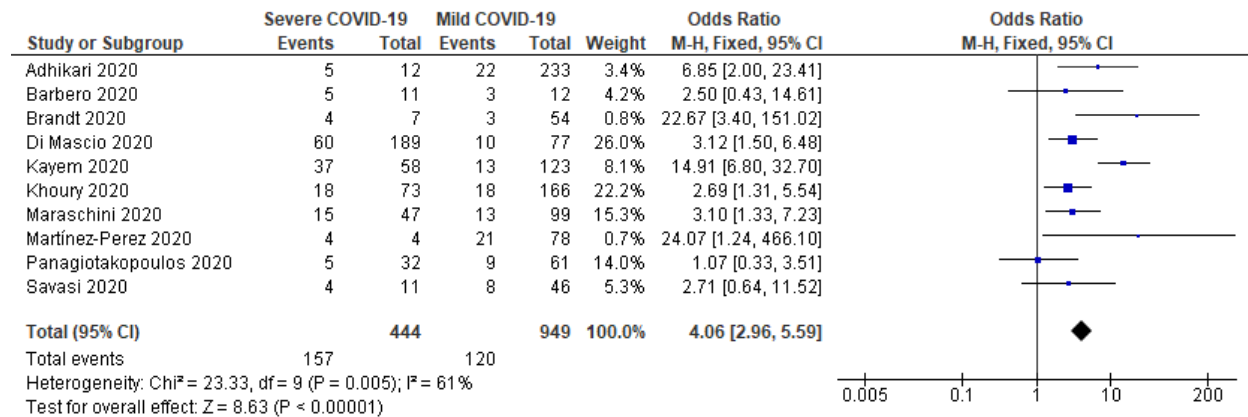

### 5.3.9. Association of severe COVID-19 with gestational age at birth (weeks)

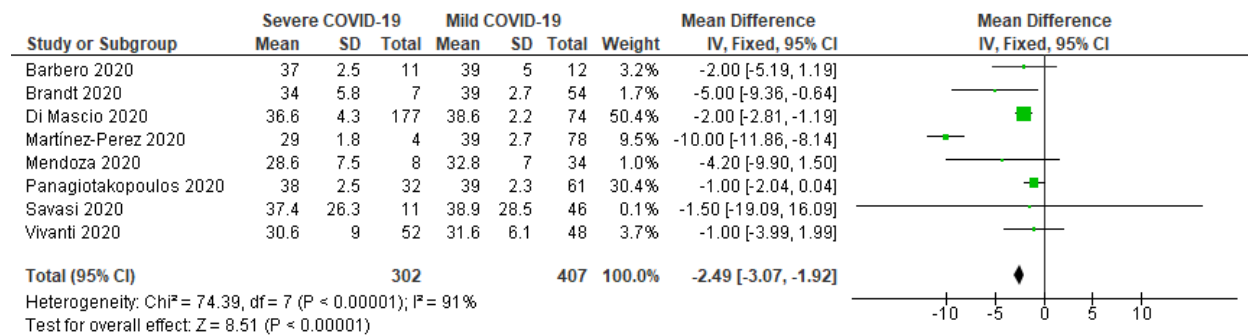

### 5.3.10. Association of severe COVID-19 with low birth weight

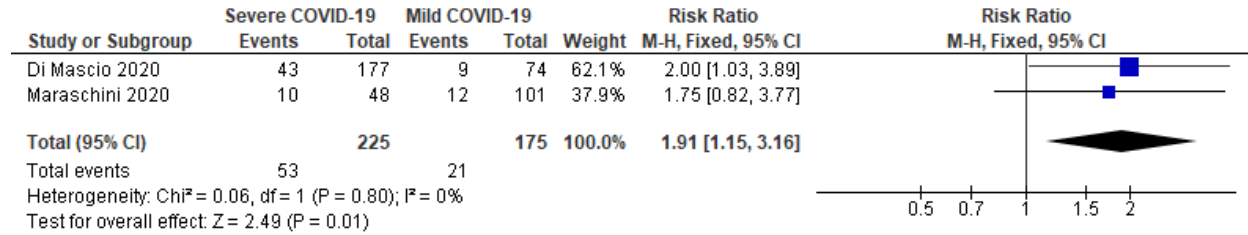

### 5.3.11. Association of severe COVID-19 with neonatal intensive care unit (NICU) admission

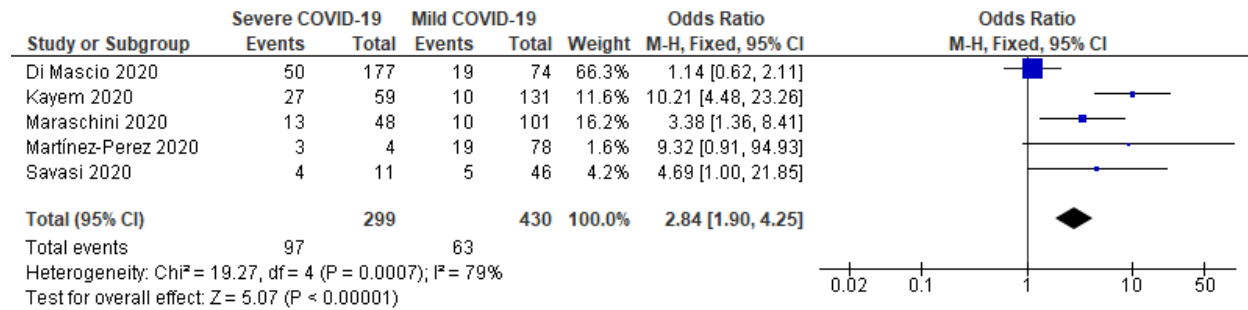

### 5.3.12. Association of severe COVID-19 with neonatal death

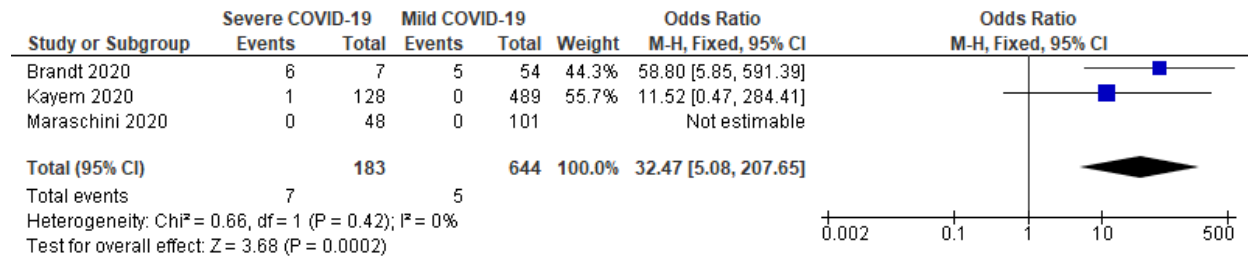

Supplement: 202604-res-5-at.pdf [file 202604-res-5-at.pdf]
